# Supplementary material for: Deep eutectic solvent stabilised Co–P films for electrocatalytic oxidation of 5-hydroxymethylfurfural into 2,5-furandicarboxylic acid
Source: Royal Society of Chemistry journal article supplement (doi:10.1039/d0nj01426e), 2020-01-01
Supplement: d0nj01426e1.pdf [file d0nj01426e1.pdf]

Electronic Supplementary Information

**Deep Eutectic Solvent Stabilised Co-P film for  
Electrocatalytic Oxidation of 5-hydroxymethylfurfural into  
2,5-furandicarboxylic Acid**

Myung Jong Kang,<sup>a</sup> Hye Jin Yu,<sup>a,b</sup> Hyun Sung Kim<sup>b,\*</sup> and Hyun Gil Cha<sup>a,\*</sup>

<sup>a</sup> Center for Bio-based chemistry, Korea Research Institute of Chemical Technology (KRICT), Ulsan  
44429, Republic of Korea

<sup>b</sup> Department of Chemistry, Pukyong National University, Busan 48513, Republic of Korea

hgcha@krict.re.kr

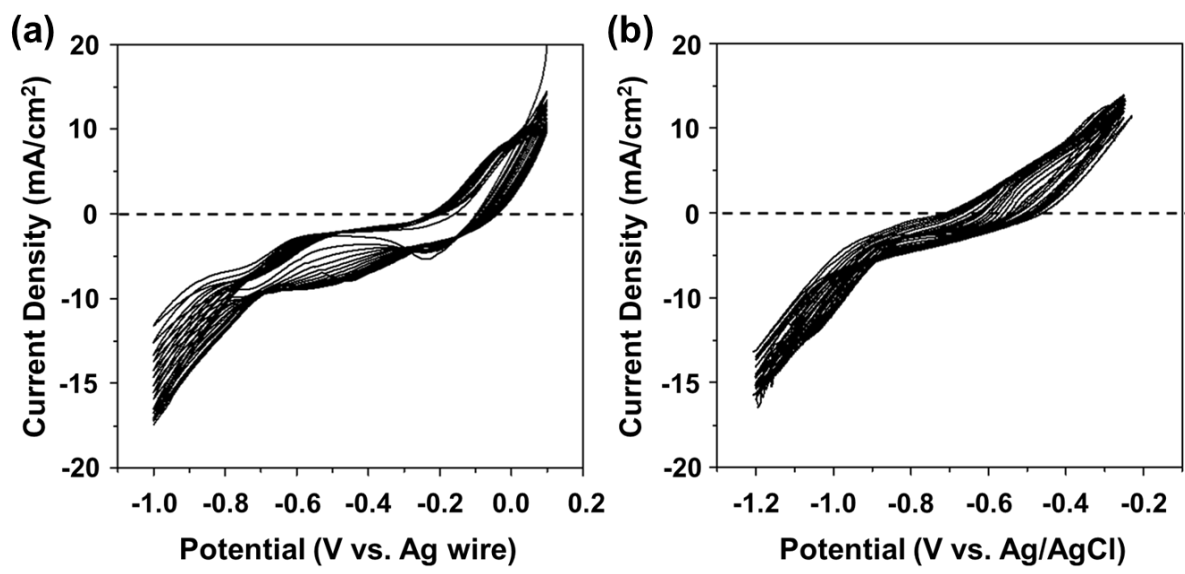

**Fig. S1.** Cyclic voltammetry (CV) curves during preparation of (a) Co-P\_DES and (b) Co-P\_H<sub>2</sub>O electrodes

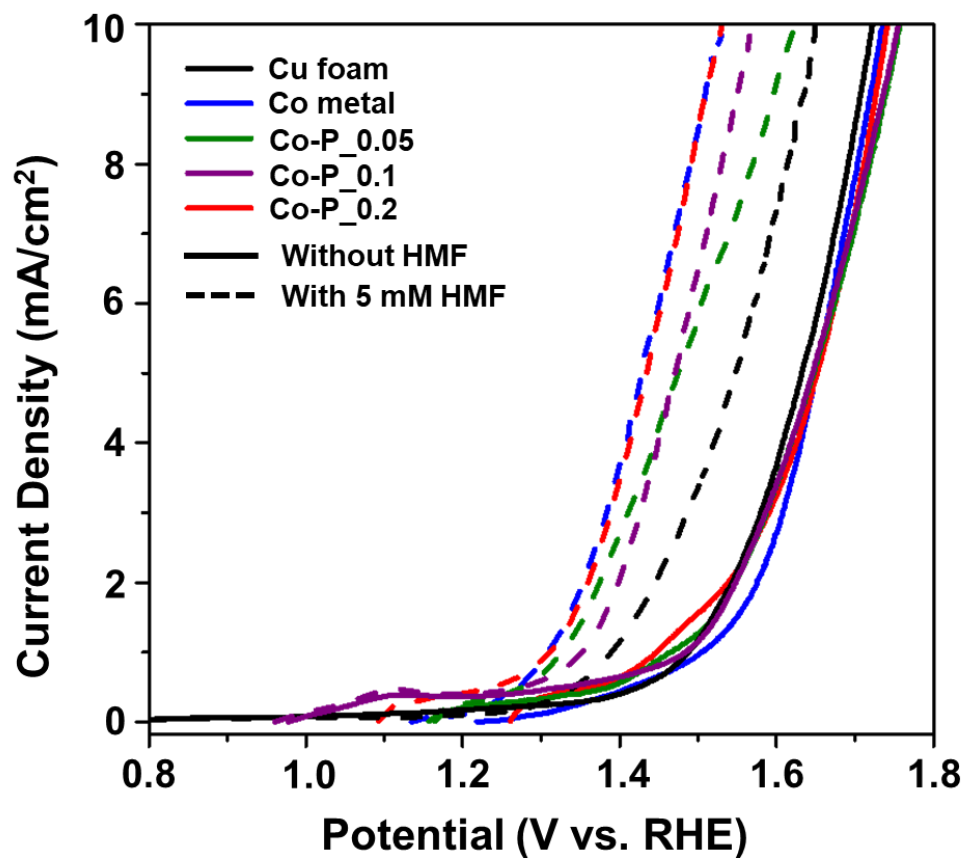

**Fig. S2.** LSVs of Cu foam, Co metal and Co-P deposited on Cu foam with various concentration of P precursor in 0.5 M NaHCO<sub>3</sub> electrolyte (solid line: without HMF, dash line: with 5 mM of HMF)

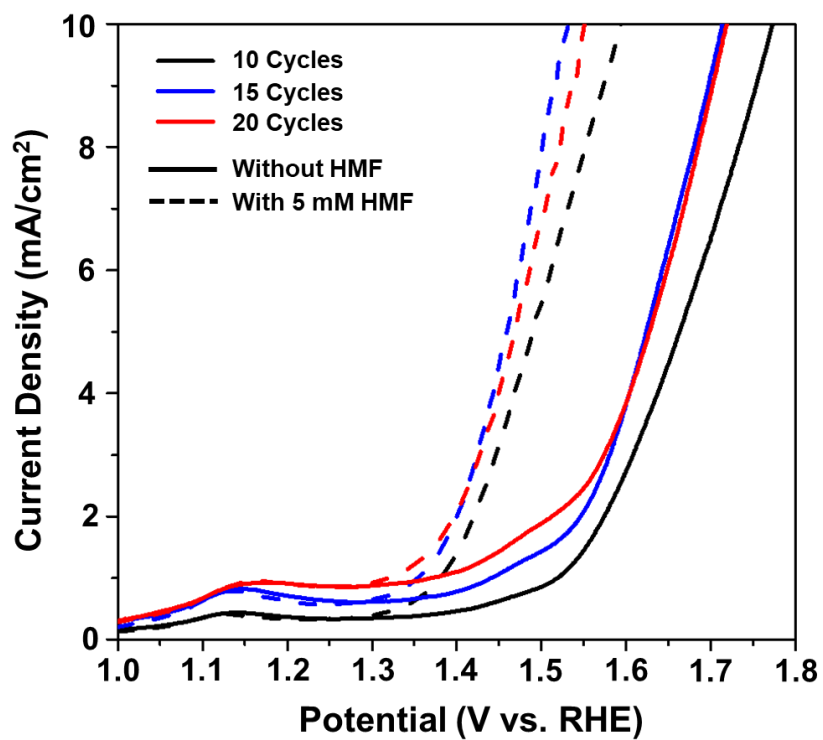

**Fig. S3.** LSV curves of Co-P\_DES within different cycles during potentiodynamic deposition in 0.5 M NaHCO<sub>3</sub> electrolyte (solid line: without HMF, dash line: with 5 mM of HMF)

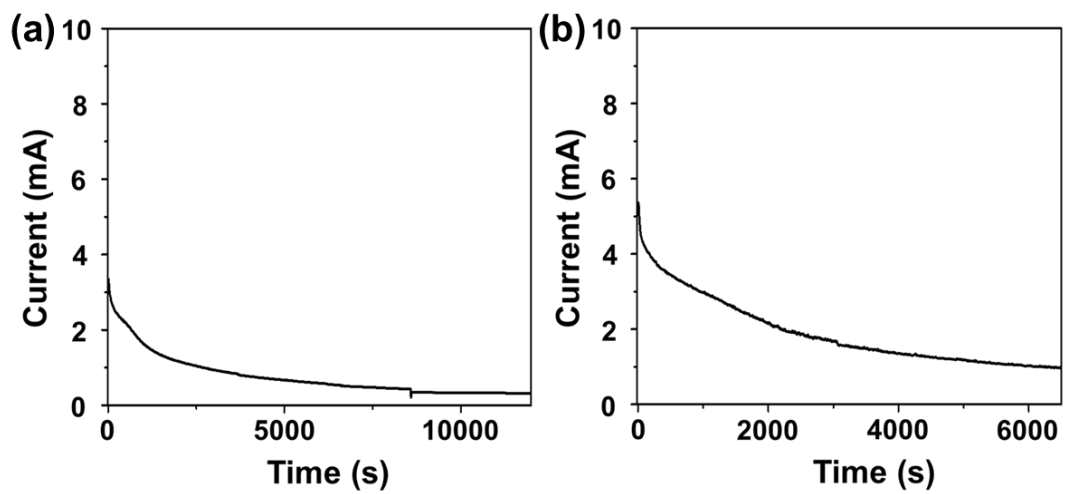

**Fig. S4.** J-t curves during electrochemical HMF oxidation reaction by (a) Co-P<sub>H2O</sub> and (b) Co-P<sub>DES</sub> electrodes.

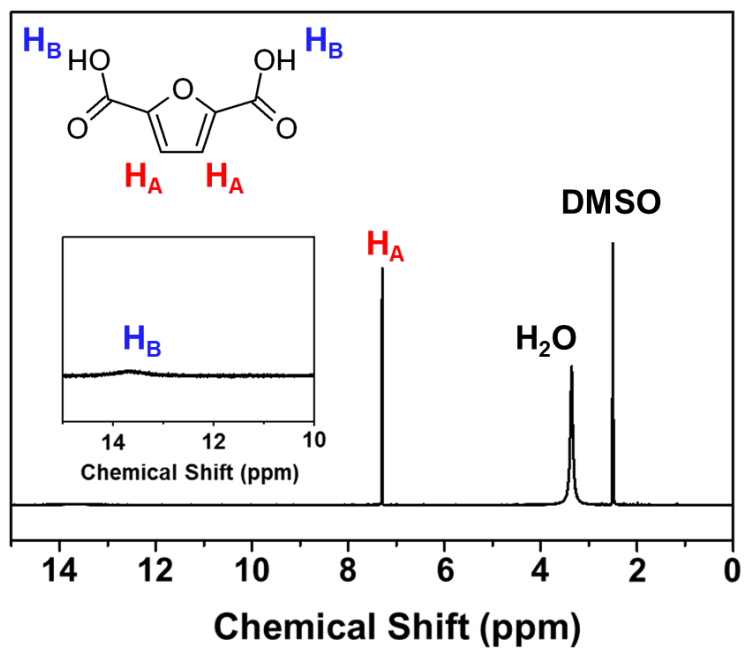

Fig. S5.  $^1\text{H}$  proton NMR spectrum of purified FDCA.
